# Supplementary material for: Uniform hierarchical MoO2/carbon spheres with high cycling performance for lithium ion batteries
Source: Royal Society of Chemistry journal article supplement (doi:10.1039/c3ta12566a), 2013-01-01
Supplement: c3ta12566a.pdf [file c3ta12566a.pdf]

# **Uniform Hierarchical MoO<sub>2</sub>/carbon Spheres with Super Cycling Performance for Lithium Ion Batteries**

Hao-Jie Zhang, Tian-Hao Wu, Kai-Xue Wang,<sup>\*</sup> Xue-Yan Wu, Xiao-Ting Chen,

Yan-Mei Jiang, Xiao Wei and Jie-Sheng Chen<sup>\*</sup>

*School of Chemistry and Chemical Engineering, Shanghai Jiao Tong University,*

*Shanghai, China*

*Email: k.wang@sjtu.edu.cn and chemcj@sjtu.edu.cn*

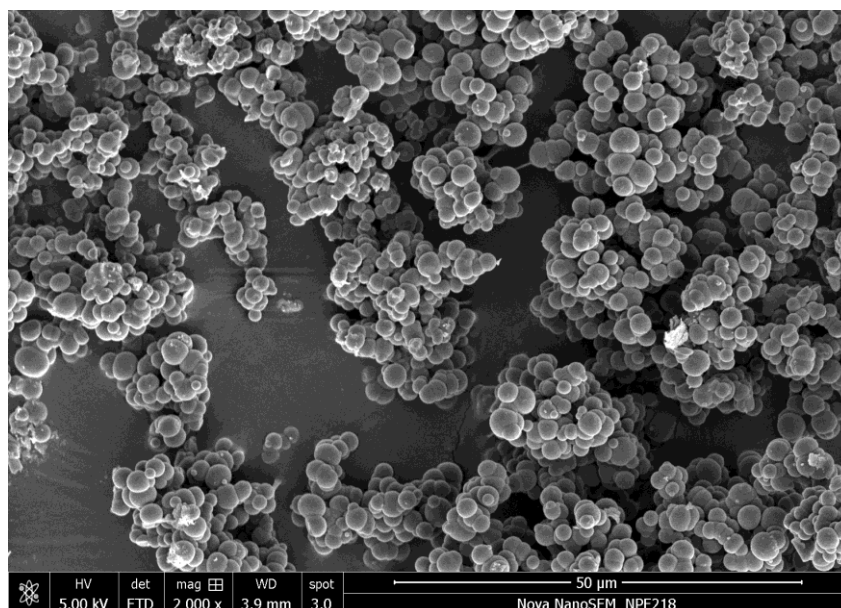

Figure S1. SEM image of carbon spheres. The size of the carbon spheres are approximately 1.5 μm in diameter.

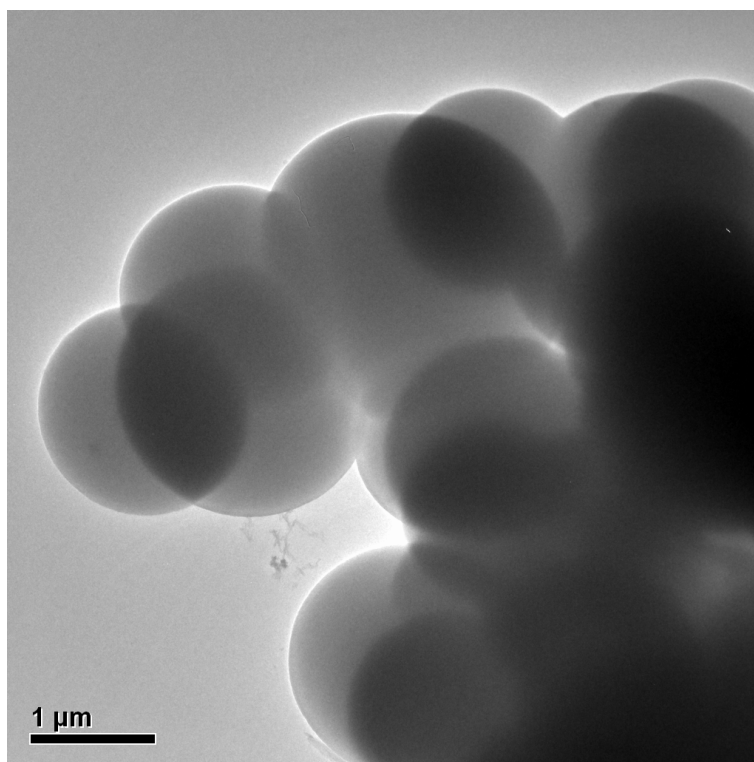

Figure S2. TEM image of carbon spheres. The carbon spheres have smooth surfaces.

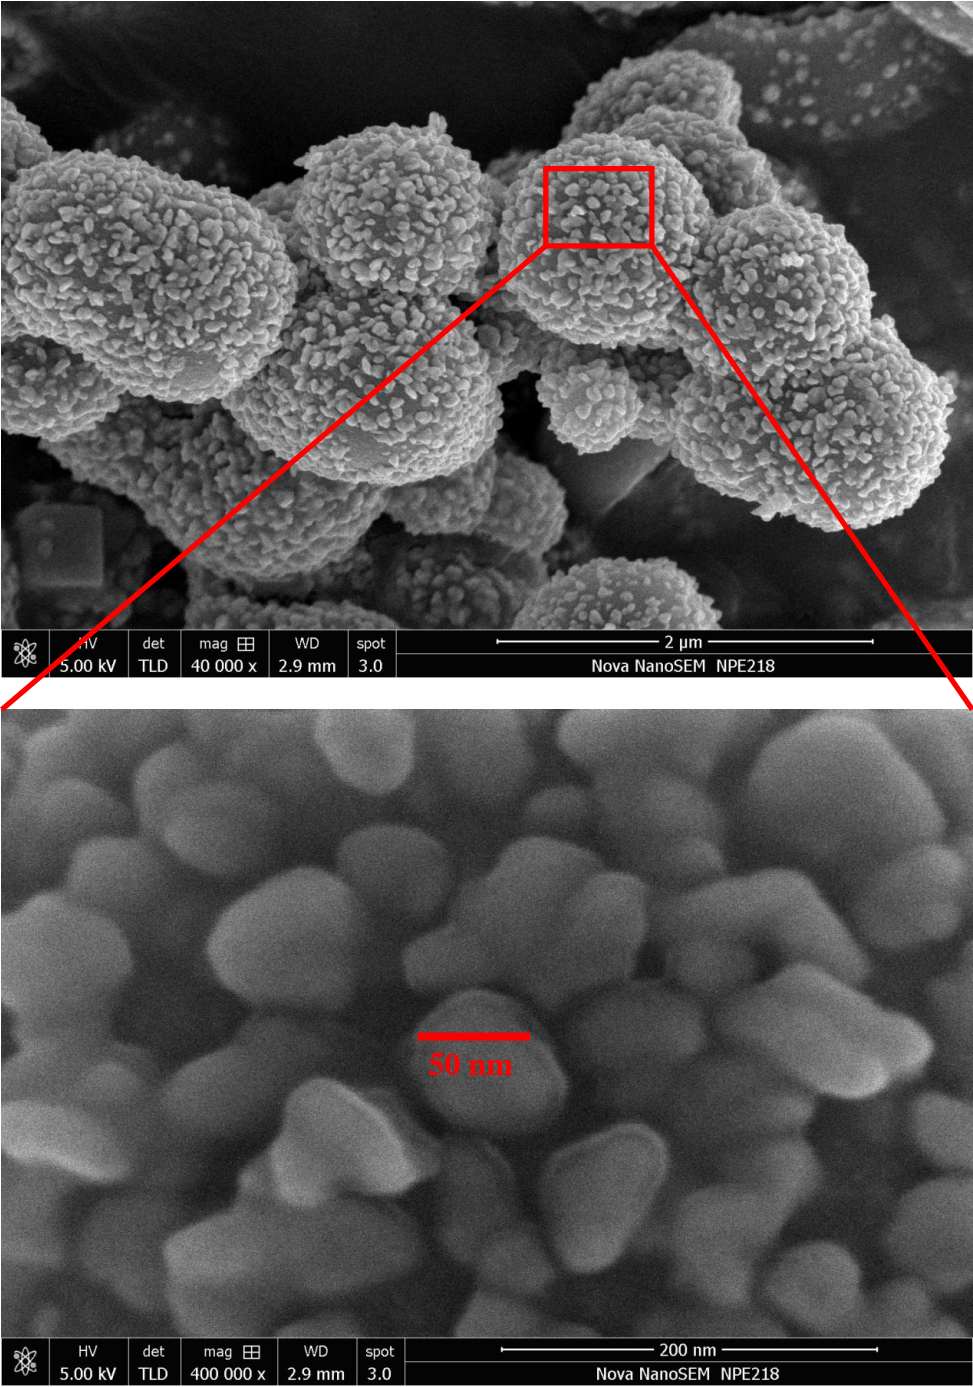

Figure S3. SEM images of MoO<sub>2</sub>/C-550.

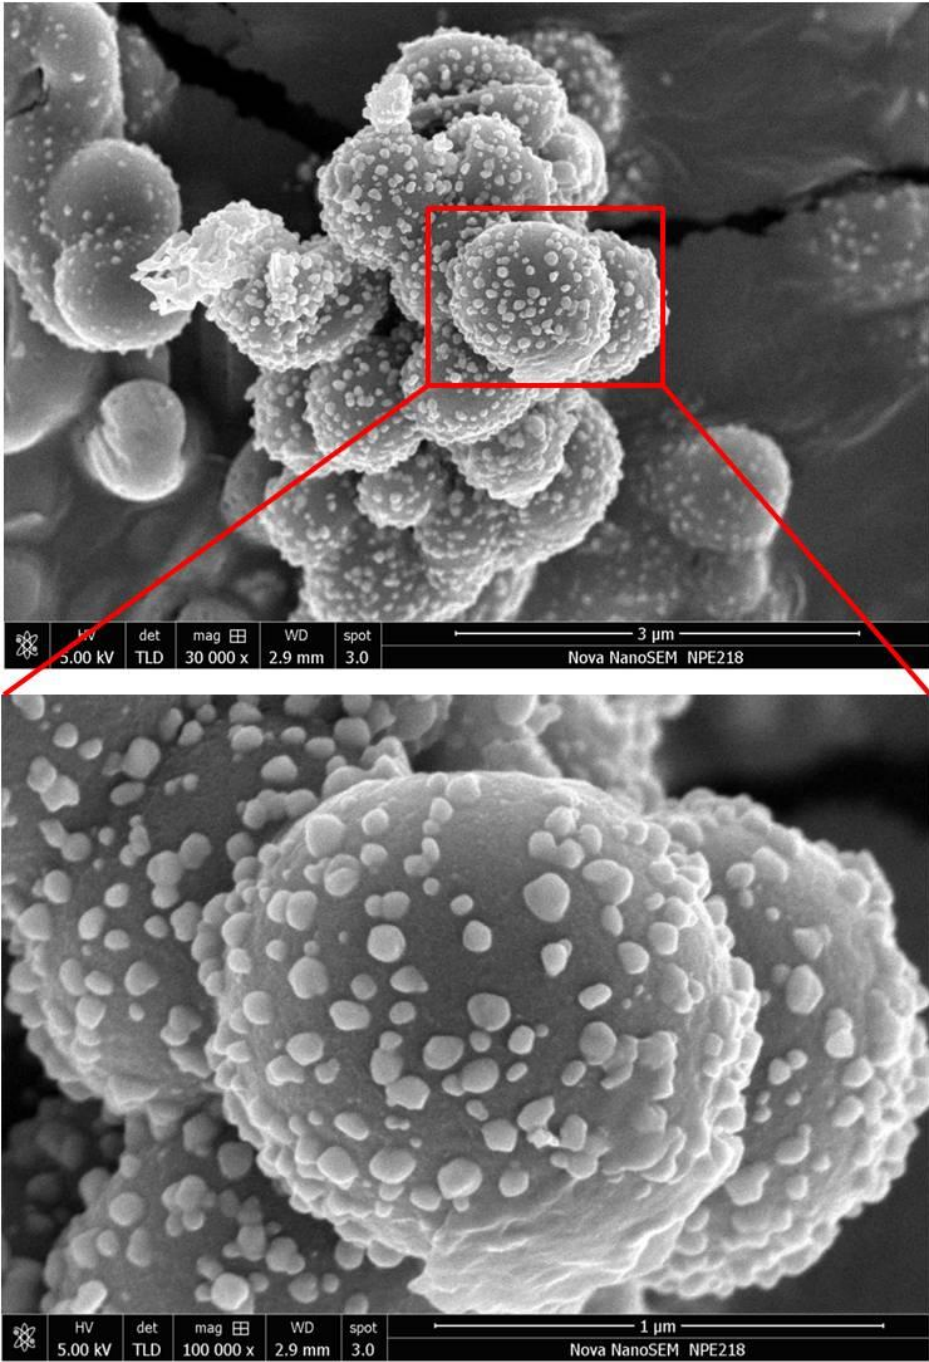

Figure S4. SEM images of MoO<sub>2</sub>/C-600.

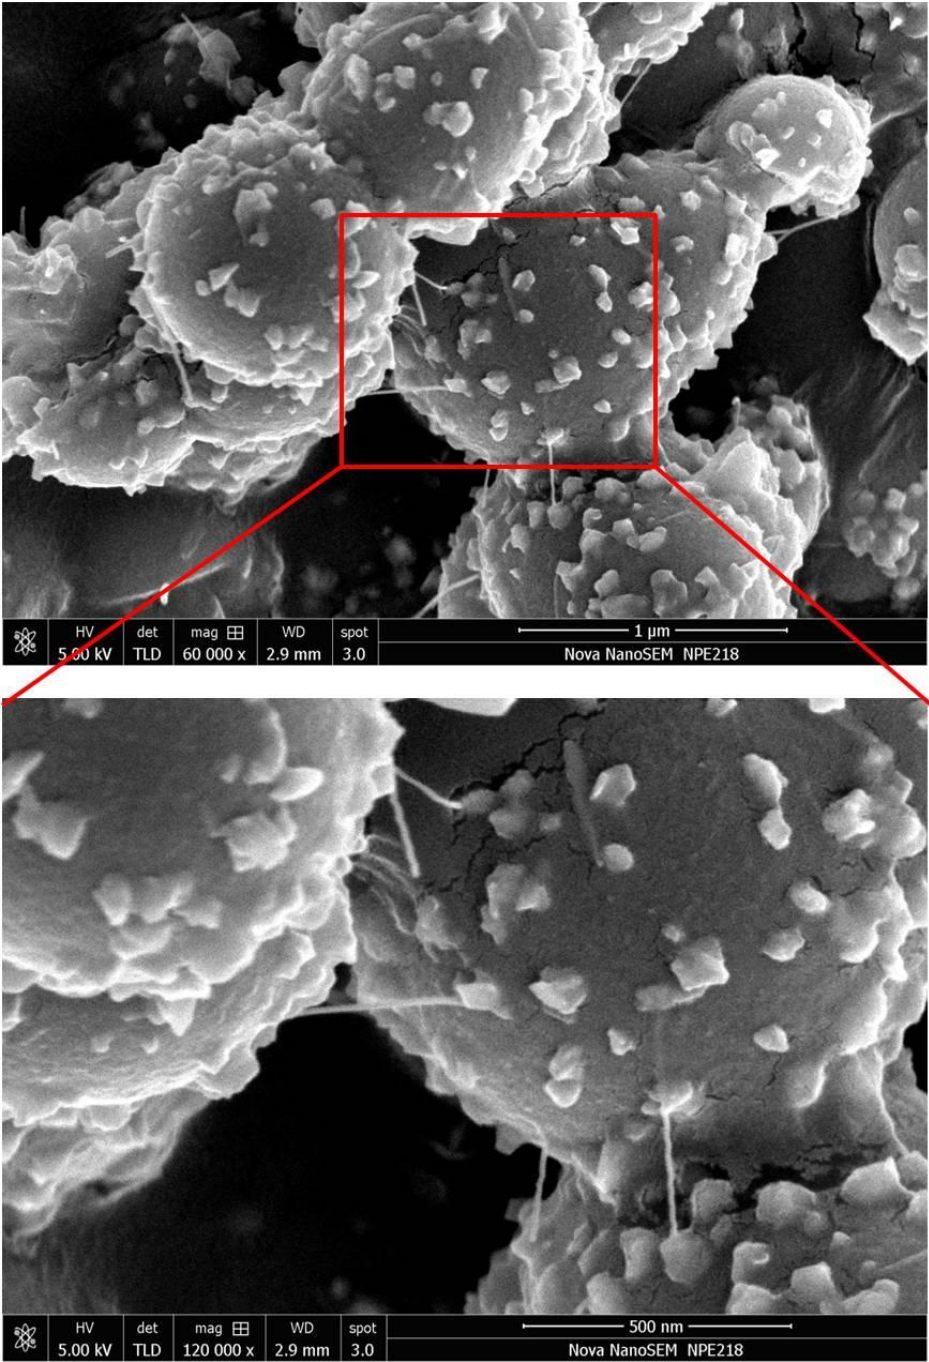

Figure S5. SEM images of MoO<sub>2</sub>/C-700.

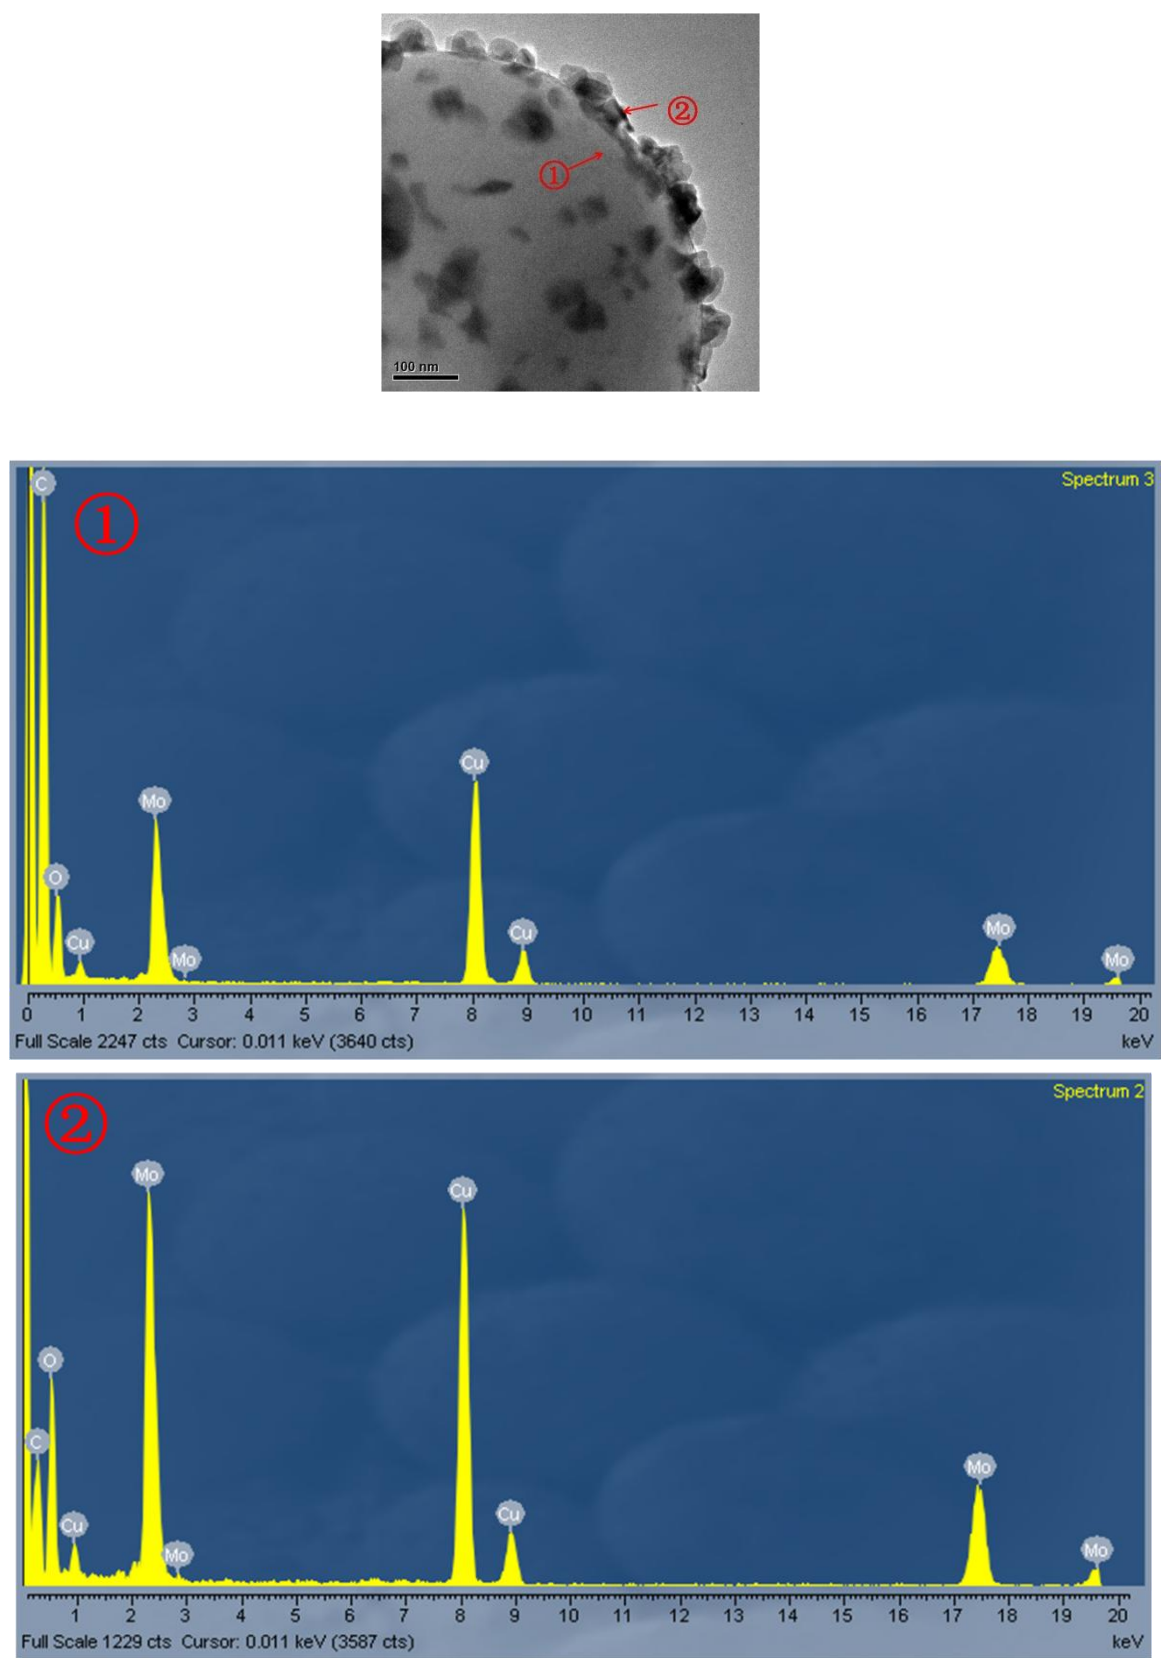

Figure S6. TEM and EDS images of MoO<sub>2</sub>/C-600.

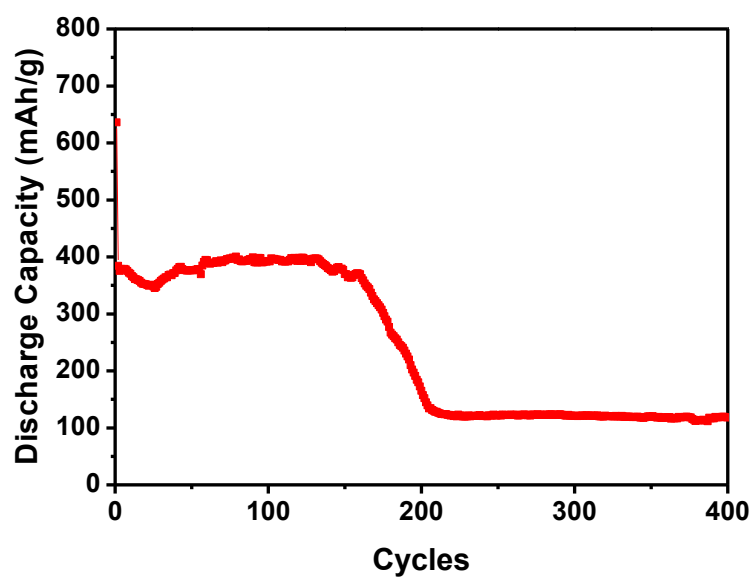

Figure S7. Cycling performance of MoO<sub>2</sub>/C-700 at a current density of 1.0 A/g over a potential range of 0.01-3.0 V.

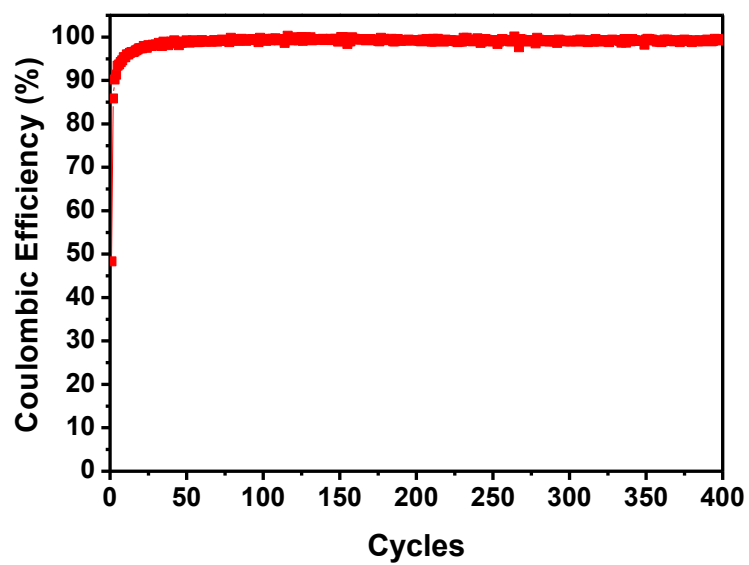

Figure S8. Coulombic efficiency of MoO<sub>2</sub>/C-600 at a current density of 1.0 A/g over a potential range of 0.01-3.0 V.

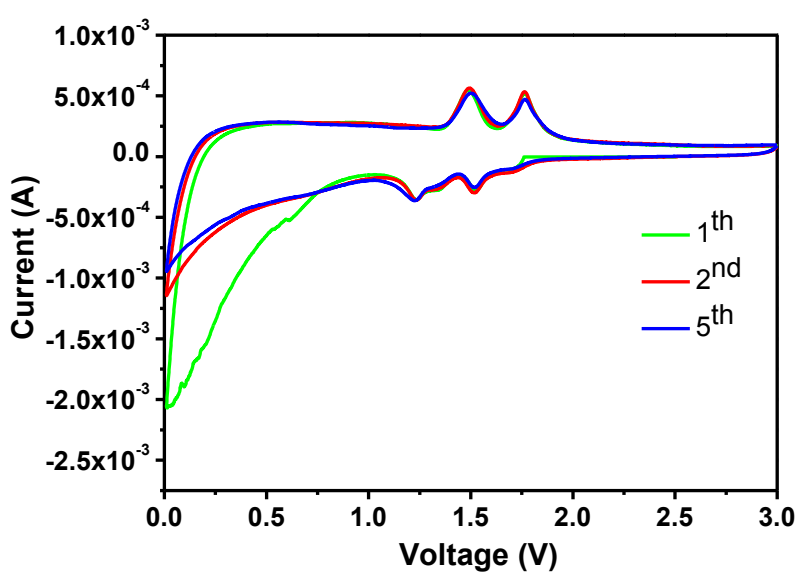

Figure S9. CV curves of MoO<sub>2</sub>/C-550 at a scan rate of 0.5 mV/s over a potential range of 0.01~3.0 V.

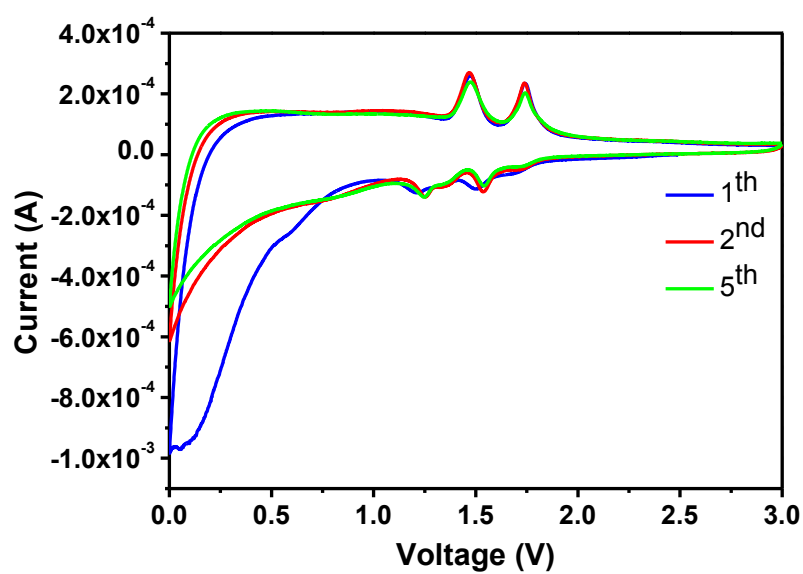

Figure S10. CV curves of MoO<sub>2</sub>/C-700 at a scan rate of 0.5 mV/s over a potential range of 0.01~3.0 V.
